# Extended Brain Sources Estimation via Unrolled Optimization Neural Network

Meng Jiao and Feng Liu

School of Systems and Enterprises  
Stevens Institute of Technology, Hoboken, NJ, 07030, USA  
{mjiao, fliu22}@stevens.edu

**Abstract.** Electroencephalography (EEG)/Magnetoencephalography (MEG) source imaging aims to seek an estimation of underlying activated brain sources to explain the observed EEG/MEG recording. Due to the ill-posed nature of inverse problem, solving EEG/MEG Source Imaging (ESI) requires design of regularization or prior terms to guarantee a unique solution. Traditionally, the design of regularization terms is based on preliminary assumptions on the spatio-temporal structure in the source space. In this paper, we propose a novel paradigm to solve the ESI problem by using Unrolled Optimization Neural Network (UONN) (1) to improve the efficiency compared to traditional iterative algorithms; (2) to establish a data-driven way to model the source solution structure instead of using hand-crafted regularizations; (3) to learn the hyperparameter automatically in a data-driven manner. The proposed framework is based on unfolding of the iterative optimization algorithm with neural network modules. The proposed new learning framework is the first one that use the unrolled optimization neural network to solve the ESI problem. The newly designed framework can effectively learn the source extents pattern and achieved significantly improved performance compared to benchmark algorithms.

**Keywords:** EEG/MEG Source Imaging, Inverse Problem, Unrolled Optimization, Deep Learning, Epilepsy Source Localization

## 1 Introduction

Understanding the complex firing neurons and interactions between neural circuits at different brain regions paves an important path to uncover the brain mechanism and brain dysfunctions [1]. Electroencephalography (EEG) or Magnetoencephalography (MEG) is a measurement of the electric potentials on the scalp generated from the electric current sources in the brain [2]. The EEG/MEG measurement is a measures directly the electric firing pattern in the brain, while fMRI, measures the blood-oxygen-level-dependent (BOLD) signal, which is a secondary measurement of the metabolic signal. EEG/MEG has a very high temporal resolution up to 1 millisecond compared to the temporal resolution of around 1 second for fMRI. EEG or MEG devices also have the advantage of being inexpensive, easity portability and versatility. EEG is accepted as a powerful tool to capture the instantaneous brain functionality by measuring the

neuronal processes [3]. However, one disadvantage of EEG is its poor spatial resolution and it measures the electric potential on the scalp instead of the underlying sources in the brain. EEG/MEG source imaging (ESI) bridges the gap between the scalp EEG measurement to the brain source activations as it infers the brain sources activation by solving the inverse problem based on the measurement of EEG or MEG [4]. However, given that the dimension of source signal significantly outnumbers the EEG/MEG sensors, the ESI is an ill-conditioned inverse problem that requires sophisticated design of regularizations that utilize the spatial-temporal assumptions on the source space [5, 6].

Recently, numerous algorithms have been developed with different assumptions on the source structure. One seminal work is minimum norm estimate (MNE) where  $\ell_2$  norm is used as a regularization [7]. Variants of MNE algorithm include dynamic statistical parametric mapping (dSPM) [8] and standardized low-resolution brain electromagnetic tomography (sLORETA) [9]. The  $\ell_2$ -norm based methods tend to render spatially-diffuse source estimation. To promote a sparse solution, Uutela *et al.* [10] introduced the  $\ell_1$ -norm, known as minimum current estimate (MCE). Also, Rao and Kreutz-Delgado proposed an affine scaling method [11] for a sparse ESI solution. Bore *et al.* proposed to use the  $\ell_p$ -norm regularization ( $p < 1$ ) on the source signal and the  $\ell_1$  norm on the data fitting error term [12]. Babadi *et al.* [13] demonstrated that sparse distributed solutions to event-related stimuli can be found using a greedy subspace-pursuit algorithm. It is worth noting that the sparse constraint can be applied to the original source signal or the transformed spatial gradient domain [14, 15]. As the brain is activated not discretely or pointwisely, an extended area of source estimation is preferred [16], and it has been used for multiple applications, such as somatosensory cortical mapping [17], and epileptogenic zone in focal epilepsy patients [18].

Most of the recently developed algorithms requires an iterative procedure to reach the final solution, which can be time consuming. Inspired by the recent advancement of unrolled optimization in solving the inverse problem [19–21], we attempt to use the unrolled optimization deep learning framework to solve the ESI problem to improve the accuracy and efficiency solving ESI problem. The advantage of using the unrolled optimization framework is to learn a data-driven regularization instead of using hand-crafted one such as total variation [22], and also replace the iterative procedure with neural network modules, thus improving the online reconstruction efficiency significantly.

## 2 EEG/MEG source imaging problem

EEG data are mostly generated by pyramidal cells in the gray matter with an orientation perpendicular to the cortex. The ESI forward model can be expressed as  $Y = LS + E$ , where  $Y \in \mathbb{R}^{C \times T}$  is the EEG/MEG measurements,  $C$  is the number EEG/MEG channels,  $T$  is the number of time points,  $L \in \mathbb{R}^{C \times N}$  is the *leadfield* matrix which characterizes the mapping from brain source space to EEG/MEG channel space,  $S \in \mathbb{R}^{N \times T}$  represents the electrical potentials in  $N$  source locations for all the  $T$  time points, and  $E$  is the uncertainty/noise. The ESI inverse problem is to estimate  $S$  given the EEG/MEG measurements. Since channel number  $C$  is much smaller than the number of sources  $N$ , estimating  $S$  becomes ill-posed and has infinitely number of solutions. In

order to find a unique solution, different regularizations were introduced by using prior assumptions of the source solution. More specifically,  $S$  can be obtained by solving the following minimization problem:

$$\operatorname{argmin}_S \frac{1}{2} \|Y - LS\|_F^2 + \lambda R(S), \quad (1)$$

where  $\|\cdot\|_F$  is the Frobenius norm. The first term of Eq.(1) is called *data fitting* which tries to explain the observed EEG data, and the second term is called *regularization* term which is imposed to find a unique solution of Eq.(1) by using the sparsity or other neurophysiology inspired regularizations. If  $R(S)$  equals  $\ell_2$  norm, the problem is called minimum norm estimate (MNE) [7]; if  $R(S)$  is defined using  $\ell_1$  norm, the problem becomes minimum current estimate (MCE) [10].

**ESI model with edge sparse total variation:** As the cortex is discretized with 3D meshes, simply employing  $\ell_1$  norm on  $S$  will result in an estimated discrete source located across the cortex instead of an extended continuous area in the cortex. In order to encourage source extents estimation, Ding proposed to use a sparse constraint in the transformed domain by introducing TV defined from the irregular 3D mesh [22]. Other researchers used the same TV definition such as [4, 23–25]. The TV was defined to be the  $\ell_1$  norm of the first order spatial gradient using a linear transform matrix  $V \in \mathbb{R}^{P \times N}$  with its definition can be found in [22], where  $N$  is the number of voxels/sources,  $P$  equals the sum of the degrees of all source nodes. Qin et al [26] used a fractional-order total variation term to promote ‘‘Gaussian’’ shape of activation. The model with sparsity and total variation constraints are given as follows:

$$S = \operatorname{argmin}_S \frac{1}{2} \|Y - LS\|_F^2 + \lambda \|VS\|_1 \quad (2)$$

where  $\|\cdot\|_1$  represents  $\ell_1$  norm on both row and column of a vector or matrix. The first term is the data fitting term, and the second term is the total variation term. Ideally, the TV regularization promotes source extents estimation. However, it is worth noting that the TV transformation matrix is *hand-crafted*, either defined on the first or second spatial derivative, or using fractional-order TV, it can be limiting the flexibility of source configurations. In this paper, we try to *learn* the total variation in a data-driven way by using Unrolled Optimization Neural Network (UONN). The proposed network architecture is given in Fig.1.

### 3 Proposed unrolled optimization neural network

In this study, we use the recent development of network based compressive sensing (CS) approach [19], the framework is based on iterative shrinkage-thresholding algorithm (ISTA) for solving generally  $\ell_1$  norm CS problem [27]. The traditional ISTA iterative reconstruction into a deep neural network. To solve Eq. 2, the following update steps are iterated in ISTA:

$$R^{(k)} = S^{(k-1)} - \rho L^T (LS^{(k-1)} - Y), \quad (3)$$

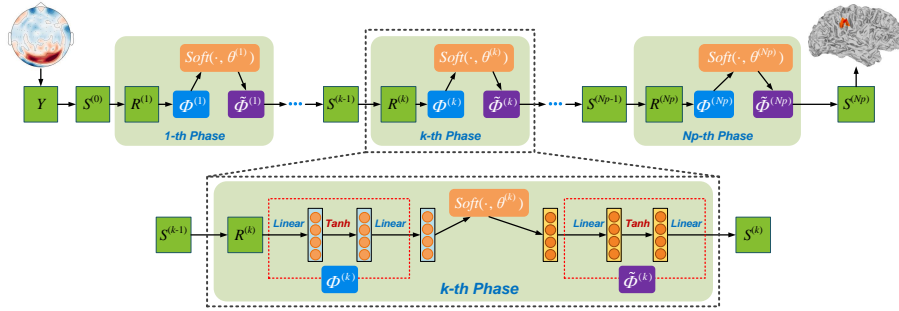

Fig. 1: Illustration of the proposed network architecture.

$$S^{(k)} = \operatorname{argmin}_S \frac{1}{2} \|S - R^{(k)}\|_2^2 + \lambda \|VS\|_1, \quad (4)$$

where  $k$  denotes the iteration index, and  $\rho$  is the step size. Eq. (3) is the gradient decent update of  $S$ , with an updated  $S$  denoted as  $R$ . Eq. (4) is a special case of proximal mapping, *i.e.*,  $\operatorname{prox}_{\lambda\Phi}(R^k)$  and  $\cdot$ . Instead of using the hard  $\|VS\|_1$ , we use  $\Phi(S)$  to learn the implicit  $VS$  in a data-driven manner. Thus, the above objective function is re-written as:

$$\min_S \frac{1}{2} \|Y - LS\|_F^2 + \lambda \|\Phi(S)\|_1 \quad (5)$$

Solving Eq. (5) using ISTA, the Eq. (4) becomes

$$S^{(k)} = \operatorname{argmin}_S \frac{1}{2} \|S - R^{(k)}\|_F^2 + \lambda \|\Phi(S)\|_1 \quad (6)$$

The two iterative steps of Eq.(3) and Eq. (6) can be cast into two separate modules in the  $k$ -th iteration of UONN, which is the  $R^{(k)}$  module and  $S^{(k)}$  module. Similar to Zhang & Ghanem [19], we allow the step size  $\rho$  to vary across iterations, so the output of this module is given as:

$$R^{(k)} = S^{(k-1)} - \rho^{(k)} L^T (LS^{(k-1)} - Y) \quad (7)$$

The  $S^{(k)}$  module is to compute the  $S^{(k)}$  with an input  $R^{(k)}$ . We use an approximated optimization function defined as follows:

$$S^{(k)} = \operatorname{argmin}_S \frac{1}{2} \|\Phi(S) - \Phi(R^{(k)})\|_F^2 + \theta \|\Phi(S)\|_1 \quad (8)$$

The above equation has a closed-form solution for  $\Phi(S^{(k)})$ , which is

$$\Phi(S^{(k)}) = \operatorname{soft}(\Phi(R^{(k)}), \theta^{(k)}) \quad (9)$$

As our goal is to find  $S$  rather than  $\Phi(S)$ , we introduce a learnable implicit inverse function  $\tilde{\Phi}(S)$ , satisfying  $\tilde{\Phi}(\Phi(S)) = S$ . As a result, the update on  $S^{(k)}$  is written as:

$$S^{(k)} = \tilde{\Phi}(\operatorname{soft}(\Phi(R^{(k)}), \theta^{(k)})) \quad (10)$$

The soft shreshold function  $soft(x, a)$  is defined as  $\text{sign}(x) \max(|x| - a, 0)$ . The update on  $S$  is implemented using 2-layers fully connected network connected with a sigmoid activation function (to learn  $\tilde{\Phi}(\cdot)$ ), and same struture for  $\tilde{\Phi}$ , and linked by a soft threshold operator. The structure of proposed network is illustrated in Fig. (Meng will create it, please refer to Fig.2 of Jian's ISTA-Net paper).

With this learnable spatial structure expression for  $S$  using  $\tilde{\Phi}(S)$ , we aim to learn a more flexible data-driven expression for the extended source activation. The learnable parameters include  $\Theta = \{\rho^{(k)}, \theta^{(k)}, \tilde{\Phi}^{(k)}, \tilde{\Phi}^{(k)}\}_{k=1}^{N_p}$ , where  $N_p$  is the total number of UONN phases, where each phase corresponds to each iteration of ISTA algorithm, and each module in each phase corrsponds to the  $R$  update and  $S$  update in Eq. (3) and Eq. (4).

**Loss function:** With the training data tuples  $\{y_i, s_i\}$  for  $i \in \{1, \dots, T\}$ , the UONN generates the reconstruction result denoted as  $s_i^{(N_p)}$ , the discrepancy loss is denoted as  $\mathcal{L}_d = \sum_{i=1}^T \|s_i - s_i^{(N_p)}\|$ , or  $\mathcal{L}_d = \sum_{i=1}^T \|S - S^{(N_p)}\|$ . Inspired by the gradual improvement of reconstructed solution, we introduced another smoothness loss  $\mathcal{L}_s = \sum_{k=1}^{N_p} \|S^{(k)} - S^{(k-1)}\|$ , to measure the consistency between two iterative steps to improve the robustness of the algorithm. The final loss function is:  $\mathcal{L}_d + \alpha \mathcal{L}_s$ , and  $\alpha$  is the weight to balance the above two loss components.

## 4 Numerical Experiments

In this section, we conducted numerical experiments to validate the effectiveness of the proposed method under different Signal Noise Ratios (SNR) for both synthetic EEG data and also validate it in real EEG data for epileptogenic zone localization.

**Simulation experiments:** We first conducted experiments on synthetic EEG data with known activation patterns, as the ground truth activation pattern for the

*Forward model:* We used a real head model to calculate the leadfield matrix. The head model was calculated based on T1-MRI images from a 26-year old male subject. Brain tissue segmentation and source surface reconstruction were conducted using FreeSurfer [28]. We used a 128-channel BioSemi EEG cap layout and coregister EEG channels with the head model using Brainstorm and further validated on MNE-Python toolbox [29]. The source space contains 1026 sources in each hemisphere, with 2052 sources combined, resulting in a leadfield matrix  $K$  with a dimension of 128 by 2052.

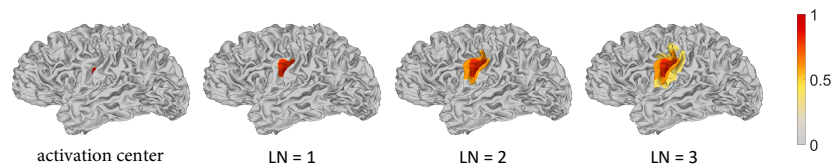

Fig. 2: Brain source distributions with different levels of neighbors (LNs).

Table 1: Performance comparison between the proposed method and benchmark algorithms

| SNR  | Level of Neighbors (LNs) | Source with one LNs    |                      | Source with two LNs    |                      | Source with three LNs  |                      |
|------|--------------------------|------------------------|----------------------|------------------------|----------------------|------------------------|----------------------|
|      | Method                   | LE                     | AUC                  | LE                     | AUC                  | LE                     | AUC                  |
| 40dB | MNE                      | 37.462 ± 35.318        | 0.938 ± 0.073        | 36.038 ± 34.599        | 0.912 ± 0.076        | 35.813 ± 34.074        | 0.898 ± 0.072        |
|      | sLORETA                  | 12.975 ± 10.221        | 0.963 ± 0.045        | 16.945 ± 11.186        | 0.937 ± 0.041        | 19.426 ± 12.386        | 0.920 ± 0.034        |
|      | dSPM                     | 36.745 ± 26.186        | 0.948 ± 0.045        | 40.136 ± 25.911        | 0.915 ± 0.044        | 42.872 ± 26.083        | 0.892 ± 0.042        |
|      | Proposed                 | <b>24.937 ± 23.106</b> | <b>0.957 ± 0.098</b> | <b>6.292 ± 3.155</b>   | <b>1.000 ± 0.000</b> | <b>10.814 ± 6.444</b>  | <b>0.992 ± 0.017</b> |
| 30dB | MNE                      | 55.188 ± 54.155        | 0.885 ± 0.116        | 53.664 ± 53.748        | 0.848 ± 0.119        | 55.318 ± 53.923        | 0.826 ± 0.112        |
|      | sLORETA                  | 22.846 ± 30.216        | 0.947 ± 0.060        | 27.358 ± 30.128        | 0.910 ± 0.056        | 29.736 ± 29.882        | 0.884 ± 0.045        |
|      | dSPM                     | 37.027 ± 26.956        | 0.937 ± 0.057        | 40.431 ± 26.631        | 0.894 ± 0.057        | 43.231 ± 26.685        | 0.862 ± 0.056        |
|      | Proposed                 | <b>24.942 ± 23.066</b> | <b>0.957 ± 0.098</b> | <b>6.294 ± 3.147</b>   | <b>1.000 ± 0.000</b> | <b>10.834 ± 6.501</b>  | <b>0.992 ± 0.017</b> |
| 20dB | MNE                      | 92.003 ± 60.367        | 0.763 ± 0.185        | 99.504 ± 57.910        | 0.716 ± 0.174        | 106.285 ± 54.699       | 0.685 ± 0.158        |
|      | sLORETA                  | 74.682 ± 60.454        | 0.853 ± 0.118        | 82.155 ± 59.295        | 0.791 ± 0.105        | 92.792 ± 57.287        | 0.750 ± 0.091        |
|      | dSPM                     | 40.286 ± 30.014        | 0.869 ± 0.103        | 42.674 ± 29.317        | 0.799 ± 0.095        | 45.388 ± 29.054        | 0.754 ± 0.089        |
|      | Proposed                 | <b>25.061 ± 23.241</b> | <b>0.956 ± 0.100</b> | <b>6.410 ± 3.257</b>   | <b>1.000 ± 0.000</b> | <b>10.851 ± 6.618</b>  | <b>0.992 ± 0.017</b> |
| 10dB | MNE                      | 115.073 ± 49.547       | 0.593 ± 0.224        | 115.424 ± 48.802       | 0.567 ± 0.196        | 116.015 ± 48.633       | 0.550 ± 0.177        |
|      | sLORETA                  | 111.976 ± 49.858       | 0.631 ± 0.187        | 112.728 ± 48.738       | 0.593 ± 0.151        | 113.480 ± 48.163       | 0.570 ± 0.131        |
|      | dSPM                     | 72.674 ± 49.649        | 0.650 ± 0.172        | 74.898 ± 49.472        | 0.606 ± 0.132        | 77.547 ± 48.895        | 0.580 ± 0.112        |
|      | Proposed                 | <b>25.861 ± 23.873</b> | <b>0.953 ± 0.104</b> | <b>7.434 ± 4.059</b>   | <b>1.000 ± 0.001</b> | <b>11.492 ± 7.309</b>  | <b>0.989 ± 0.021</b> |
| 0 dB | MNE                      | 116.648 ± 47.874       | 0.515 ± 0.219        | 116.610 ± 47.823       | 0.510 ± 0.195        | 116.950 ± 47.832       | 0.507 ± 0.179        |
|      | sLORETA                  | 114.490 ± 47.332       | 0.520 ± 0.185        | 114.123 ± 47.195       | 0.513 ± 0.155        | 114.392 ± 47.165       | 0.510 ± 0.138        |
|      | dSPM                     | 108.192 ± 48.302       | 0.523 ± 0.169        | 108.843 ± 48.346       | 0.515 ± 0.132        | 107.938 ± 47.561       | 0.511 ± 0.113        |
|      | Proposed                 | <b>32.706 ± 29.557</b> | <b>0.920 ± 0.145</b> | <b>15.298 ± 14.230</b> | <b>0.986 ± 0.041</b> | <b>19.266 ± 17.243</b> | <b>0.948 ± 0.065</b> |

*Experimental settings:* To generate EEG data, we activate all 2052 locations in the source space as the central source in turn, and used 3 different neighborhood levels (1-, 2-, and 3-level of neighborhood) to represent different sizes of source extents, illustrated in Fig.2. We activated the whole “patch” of sources corresponding to neighbors at different levels. The activation strength of the central region is set to 1, while the activation strength of the 1-, 2-, and 3-level of adjacent regions is set to 0.8, 0.6, and 0.4 successively.

Then we used the forward model to generate scalp EEG data under different SNR settings (SNR = 40 dB, 30 dB, 20 dB, 10 db and 0 dB). We set the length of EEG data in each experiment setting to be 0.5 second with 100 Hz sampling rate. For each setting of SNR and neighborhood level, we divided the simulated data into training set and testing set according to the proportion of 80% and 20%. The number of layers in the ISTA-net is set to 9, and the  $\Phi(\cdot)$  and  $\tilde{\Phi}(\cdot)$  is approximated using a fully connected feedforward neural network with single hidden layer, the input nodes, hidden nodes as well as the output nodes of the network module to approximate  $\Phi(\cdot)$  are set to 2052, 500, and 128, respectively, and the number of input nodes, hidden nodes as well as the output nodes for the network module approximating  $\tilde{\Phi}(\cdot)$  is set to be 125, 500 and 2052. The design of this module architecture is in resemblance of an autoencoder network [30]. The number of phases is set to be 9.

We chose the training set with 2-level of neighborhood and 40 dB SNR to train the UONN, then the source reconstruction is conducted on all test sets at different levels of source neighborhood configuration and settings of SNR. We picked 10 random source locations to conduct source reconstruction. The benchmark algorithms including MNE [7], dSPM [8], and sLORETA [9] were used for comparison. We quantitatively evaluated the performance of each competing algorithm based on the following metrics:

(1) *Localization error (LE)*: it measures the geodesic distance between two source locations on the cortex meshes using the Dijkstra shortest path algorithm.

Extended Brain Sources Estimation via Unrolled Optimization Neural Network 7

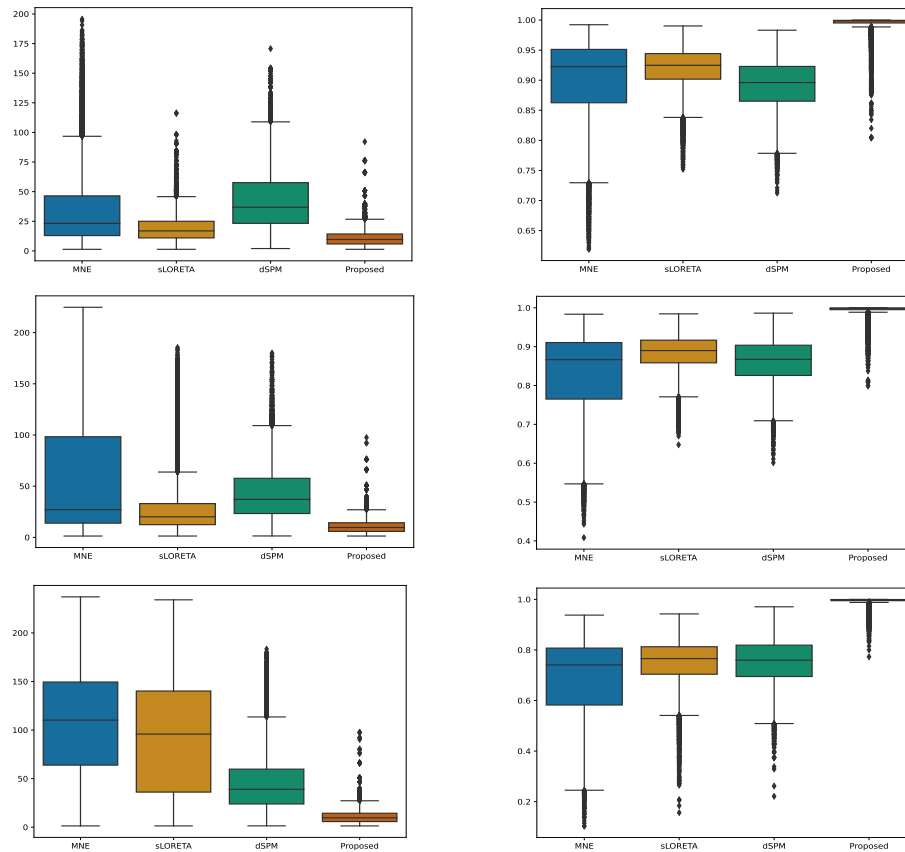

Fig. 3: Performance comparison of different algorithms on LE (on the left side) and AUC (on the right side), for SNR = 40 dB (on the top row), SNR = 30 dB (on the second row) and SNR = 20 dB (on the bottom row).

(2) *Area under curve (AUC)*: it is particularly useful to characterize the overlap of an extended source activation pattern.

Better performance for localization is expected if LE is close to 0 and AUC is close to 1. The performance comparison between the proposed method and benchmark algorithms on LE and AUC is summarized in Table 1, and the boxplot figures for SNR=40 dB, 20 dB and 10 dB is given in Fig.3.

From Table 1, we can see that compared to the benchmark algorithms MNE, dSPM, and sLORETA, the proposed UONN method exhibits excellent performance, while the benchmark algorithms can only provide satisfactory source reconstruction when the activated area is small and the SNR level is low. With the expansion of the source range and the increase of noise level, the LE values of the benchmark algorithms deteriorate significantly, so as to the AUC values. By contrast, the superiority of the UONN method is demonstrated by improved AUC values and smaller LE values. It shows better per-

formance for larger source extents and higher noise level compared to the benchmark algorithms. The corresponding LE values are always at a low level, and the AUC values are always stable above 0.94, which demonstrates the excellent stability of the proposed method. By comparing different source activation size, we can see larger source extents are more difficult to be localized exactly, with a worse AUC than smaller areas of activation, however, the localization error can be lower in the benchmark algorithms. The noise can impact significantly on the performance of all the benchmark algorithms, however, when SNR equal or above 10 dB, our algorithm performs very well in recovering the source extents.

The comparison between the reconstructed source distributions based with 3-level of neighborhood and 40 dB, 30 dB and 20 dB SNR is shown in Fig. 4.

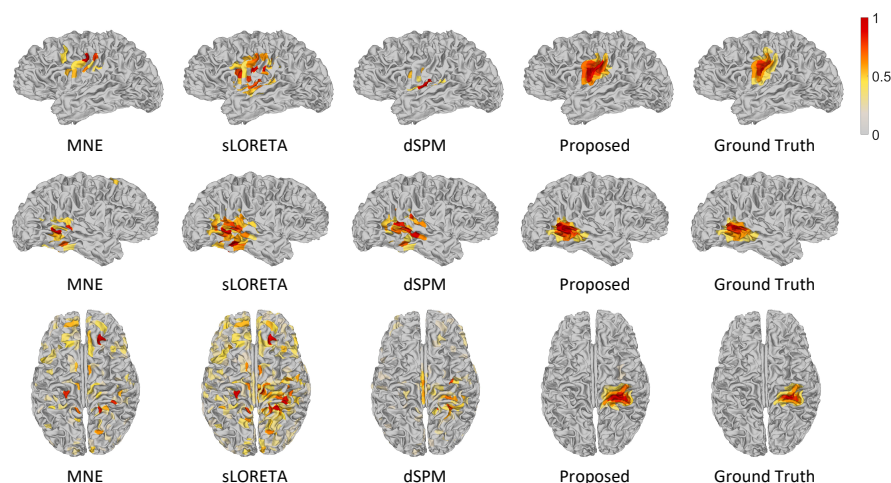

Fig. 4: Brain sources reconstruction by different ESI algorithms with 3-level of neighborhood for SNR = 40 dB (on the top row), SNR = 30 dB (on the second row) and SNR = 20 dB (on the bottom row).

#### 4.1 Real data experiments

We analyzed a real dataset that is publicly accessible through the Brainstorm tutorial datasets [31]. This dataset was recorded from a patient with focal epilepsy who was seizure-free during a 5-year follow-up period after a left frontal tailored resection. We followed the Brainstorm tutorial to obtain the head model and the lead field matrix, then we calculated the average spikes (as shown in Fig. 5) of the EEG measurements of 29 channels. We used the peak (0 ms) of the averaged interictal spike for brain source localization, and the comparison between the reconstructed source distributions based on different methods is shown in Fig. 6.

From Fig. 6, we can see that both the MNE method and the proposed UONN method can accurately locate the epileptogenic zone, which was validated by the follow-up



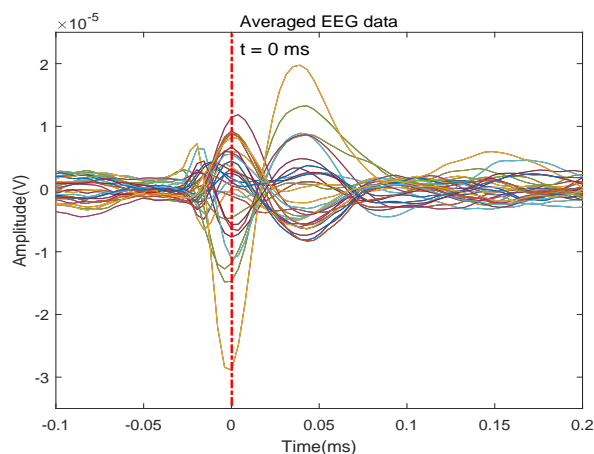

Fig. 5: Average EEG time series plot around the inter-ictal spike.

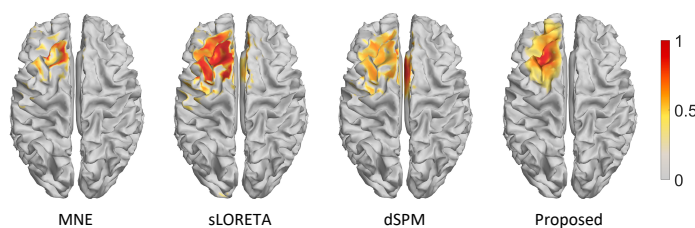

Fig. 6: Reconstructed sources by different ESI algorithms for epilepsy EEG data.

survey after resection on the left frontal region. From the source reconstruction results of the proposed method, it can be seen that in addition to the accurate location of the lesion area, the difference in signal strength between the central region and its adjacent regions can also be seen clearly. This shows that the UONN method can reconstruct source signals of different intensities corresponding to neighbors of different levels. In contrast, the source distribution area estimated by sLORETA and dSPM is highly broad, although the left frontal region is covered, part of the right frontal which is not related to the epilepsy lesion is also included. Obviously, among these methods, the proposed UONN method provides a cleaner and accurate estimation of the epileptogenic zone.

## 5 Conclusion

In this paper, we propose a new method based on deep learning unrolled optimization framework for brain source reconstruction. The proposed framework enjoys the advantage of great approximation capability and principled parameter training procedure in deep learning. It eliminates the necessity of hand-crafted total variation in the traditional method. We designed a neural network module to learn the spatial structure of source

extents. We incorporated a smoothness constraint in the loss function to mimic the iterative changes in the solution. The numerical experiments demonstrated a great boost in the performance measured by AUC and LE.

## References

1. Feng Liu, Li Wang, Yifei Lou, Ren-Cang Li, and Patrick L Purdon. Probabilistic structure learning for eeg/meg source imaging with hierarchical graph priors. *IEEE Transactions on Medical Imaging*, 40(1):321–334, 2020.
2. Romain Brette and Alain Destexhe. *Handbook of neural activity measurement*. Cambridge University Press, 2012.
3. Christoph M Michel and Denis Brunet. Eeg source imaging: a practical review of the analysis steps. *Frontiers in neurology*, 10:325, 2019.
4. Feng Liu, Jay Rosenberger, Yifei Lou, Rahilsadat Hosseini, Jianzhong Su, and Shouyi Wang. Graph regularized eeg source imaging with in-class consistency and out-class discrimination. *IEEE Transactions on Big Data*, 3(4):378–391, 2017.
5. Christoph M Michel, Micah M Murray, Göran Lantz, Sara Gonzalez, Laurent Spinelli, and Rolando Grave de Peralta. EEG source imaging. *Clinical neurophysiology*, 115(10):2195–2222, 2004.
6. Wanmei Ou, Matti S Hämäläinen, and Polina Golland. A distributed spatio-temporal EEG/MEG inverse solver. *NeuroImage*, 44(3):932–946, 2009.
7. Matti S Hämäläinen and Risto J Ilmoniemi. Interpreting magnetic fields of the brain: minimum norm estimates. *Medical & biological engineering & computing*, 32(1):35–42, 1994.
8. Anders M Dale, Arthur K Liu, Bruce R Fischl, Randy L Buckner, John W Belliveau, Jeffrey D Lewine, and Eric Halgren. Dynamic statistical parametric mapping: combining fMRI and MEG for high-resolution imaging of cortical activity. *neuron*, 26(1):55–67, 2000.
9. Roberto Domingo Pascual-Marqui et al. Standardized low-resolution brain electromagnetic tomography (sLORETA): technical details. *Methods Find Exp Clin Pharmacol*, 24(Suppl D):5–12, 2002.
10. Kimmo Uutela, Matti Hämäläinen, and Erkki Somersalo. Visualization of magnetoencephalographic data using minimum current estimates. *NeuroImage*, 10(2):173–180, 1999.
11. Bhaskar D Rao and Kenneth Kreutz-Delgado. An affine scaling methodology for best basis selection. *IEEE Transactions on signal processing*, 47(1):187–200, 1999.
12. Joyce Chelangat Bore, Chanlin Yi, Peiyang Li, Fali Li, Dennis Joe Harmah, Yajing Si, Daqing Guo, Dezhong Yao, Feng Wan, and Peng Xu. Sparse EEG source localization using lapps: Least absolute IP ( $0 < p < 1$ ) penalized solution. *IEEE Transactions on Biomedical Engineering*, 2018.
13. Behtash Babadi, Gabriel Obregon-Henao, Camilo Lamus, Matti S Hämäläinen, Emery N Brown, and Patrick L Purdon. A subspace pursuit-based iterative greedy hierarchical solution to the neuromagnetic inverse problem. *NeuroImage*, 87:427–443, 2014.
14. Lei Ding and Bin He. Sparse source imaging in electroencephalography with accurate field modeling. *Human brain mapping*, 29(9):1053–1067, 2008.
15. Feng Liu, Li Wang, Yifei Lou, Ren-Cang Li, and Patrick L Purdon. Probabilistic structure learning for eeg/meg source imaging with hierarchical graph priors. *IEEE transactions on medical imaging*, 40(1):321–334, 2020.
16. S. Baillet, J. C. Moshier, and R. M. Leahy. Electromagnetic brain mapping. *IEEE Signal processing magazine*, 18(6):14–30, 2001.
17. Chang Cai, Mithun Diwakar, Dan Chen, Kensuke Sekihara, and Srikantan S Nagarajan. Robust empirical bayesian reconstruction of distributed sources for electromagnetic brain imaging. *IEEE transactions on medical imaging*, 2019.

18. Hanna Becker, Laurent Albera, Pierre Comon, Martin Haardt, Gwénaél Birot, Fabrice Wendling, Martine Gavaret, Christian G Bénar, and Isabelle Merlet. Eeg extended source localization: tensor-based vs. conventional methods. *NeuroImage*, 96:143–157, 2014.
19. Jian Zhang and Bernard Ghanem. Ista-net: Interpretable optimization-inspired deep network for image compressive sensing. In *Proceedings of the IEEE conference on computer vision and pattern recognition*, pages 1828–1837, 2018.
20. Yuqi Li, Miao Qi, Rahul Gulve, Mian Wei, Roman Genov, Kiriakos N Kutulakos, and Wolfgang Heidrich. End-to-end video compressive sensing using anderson-accelerated unrolled networks. In *2020 IEEE International Conference on Computational Photography (ICCP)*, pages 1–12. IEEE, 2020.
21. Hemant Kumar Aggarwal, Merry P Mani, and Mathews Jacob. Model based image reconstruction using deep learned priors (modl). In *2018 IEEE 15th International Symposium on Biomedical Imaging (ISBI 2018)*, pages 671–674. IEEE, 2018.
22. L. Ding. Reconstructing cortical current density by exploring sparseness in the transform domain. *Physics in Medicine and Biology*, 54(9):2683, 2009.
23. A. Sohrabpour, Y. Lu, G. Worrell, and B. He. Imaging brain source extent from EEG/MEG by means of an iteratively reweighted edge sparsity minimization (IRES) strategy. *NeuroImage*, 142:27–42, 2016.
24. Min Zhu, Wenbo Zhang, Deanna L Dickens, and Lei Ding. Reconstructing spatially extended brain sources via enforcing multiple transform sparseness. *NeuroImage*, 86:280–293, 2014.
25. Meng Jiao, Guihong Wan, Yaxin Nancy Guo, Dongqing Wang, Hang Liu, Jing Xiang, and Feng Liu. A graph fourier transform based bidirectional lstm neural network for eeg source imaging. *Frontiers in Neuroscience*, page 447, 2022.
26. Jing Qin, Feng Liu, Shouyi Wang, and Jay Rosenberger. EEG source imaging based on spatial and temporal graph structures. In *International Conference on Image Processing Theory, Tools and Applications*, 2017.
27. Amir Beck and Marc Teboulle. A fast iterative shrinkage-thresholding algorithm for linear inverse problems. *SIAM journal on imaging sciences*, 2(1):183–202, 2009.
28. Bruce Fischl. Freesurfer. *Neuroimage*, 62(2):774–781, 2012.
29. Alexandre Gramfort, Martin Luessi, Eric Larson, Denis A Engemann, Daniel Strohmeier, Christian Brodbeck, Lauri Parkkonen, and Matti S Hämäläinen. MNE software for processing MEG and EEG data. *Neuroimage*, 86:446–460, 2014.
30. Geoffrey E Hinton and Ruslan R Salakhutdinov. Reducing the dimensionality of data with neural networks. *Science*, 313(5786):504–507, 2006.
31. François Tadel, Sylvain Baillet, John C Mosher, Dimitrios Pantazis, and Richard M Leahy. Brainstorm: a user-friendly application for MEG/EEG analysis. *Computational intelligence and neuroscience*, 2011, 2011.
